# Supplementary material
Source: PubMed Central journal article supplement (PMC3596853)
Supplement: supp_dds559_dds559supp.pdf [file supp_dds559_dds559supp.pdf]

## SUPPORTING INFORMATION

**Figure S1. Linkage disequilibrium (LD) structure across 32 kbp of genomic region encompassing the rs688 locus as estimated among all genotyped SNPs on the CEU sample available from HapMap.** A standard color scheme is used to display LD with bright red color for very strong LD ( $LOD = 2$   $D' = 1$ ), white color for no LD ( $LOD < 2$ ,  $D' < 1$ ), pink red ( $LOD = 2$   $D' < 1$ ), and blue ( $LOD < 2$   $D' = 1$ ) for intermediate LD. Values in boxes represent the pair-wise  $r^2$  measure between markers.

**Figure S2. LDLR exon 12 splicing efficiency in LCLs.** (A) *LDLR* exon 12 splicing efficiency was calculated as *LDLR 12(+)*/total *LDLR*. (B) *LDLR* total mRNA copy number was log transformed. For C/C, T/C, and T/T, n=46, 90, 37, respectively (A) and n=382, 311, 109, respectively. *LDLR* total mRNA was quantified by expression array as previously described (S1). All data were adjusted for age, sex, race, smoking and BMI. P-values were calculated with two tailed t-tests. Values plotted are mean  $\pm$  s.e.m.

**REFERENCE:**

S1 Medina MW, *et al.* (2012) RHOA is a modulator of the cholesterol lowering effects of statin *PLoS Genetics* in press

**Figure S3. Scatter plot analysis of fluorophore colocalization.** Scatter plots (A: rs688 “C” and B: “T”) were plotted for the intensity of green (LDLR) plotted against the intensity of red (lysosome) for each pixel and the Coefficients of Determination were determined by Zeiss Zen software.

**Figure S4. Effect of rs2228671 on PCSK9 regulation of LDLR.** (A) HepG2 cells were transiently transfected with a plasmid expressing LDLR containing either rs2228671 “T” or “C”, and incubated with DiI-LDL (10µg/ml) mixed with purified PCSK9 protein (0, 2µg/ml, 20µg/ml) for 5 hours. DiI-LDL uptake was determined (n=8). (B) Exogenous PCSK9 protein (2µg/ml) was preincubated with varying concentrations of IB20, a PCSK9-antibody, and subsequently mixed with DiI-LDL (10µg/ml). Rate of DiI uptake was quantified in transiently transfected HepG2 cells (n=8) as described in part A. \*MFI: Mean Fluorescence Intensity.

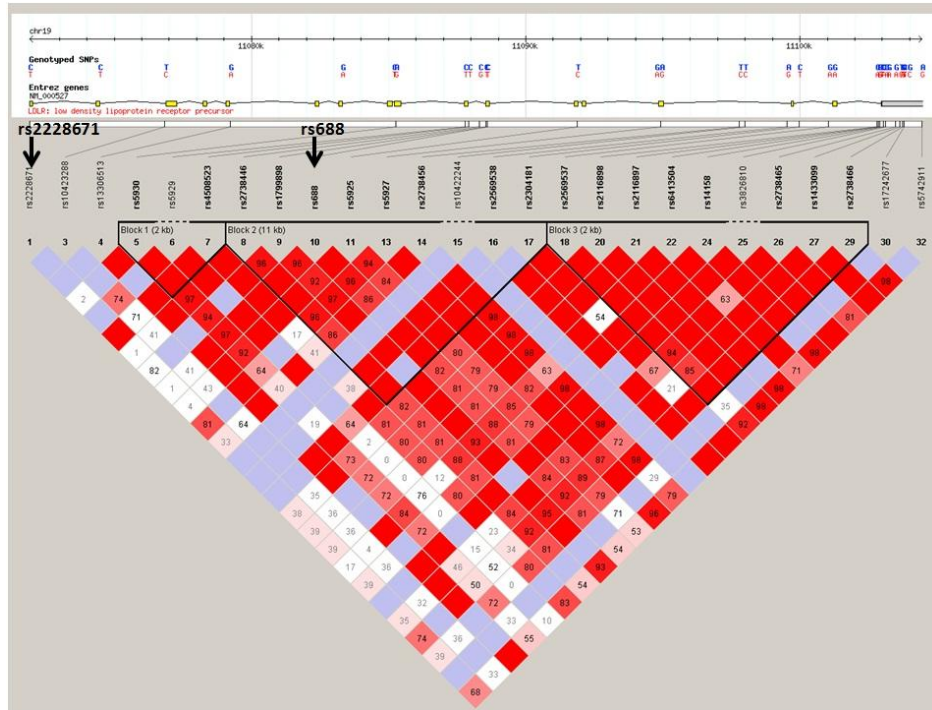

Figure S1

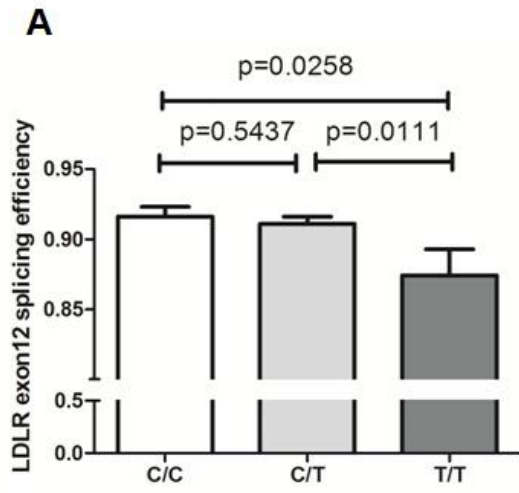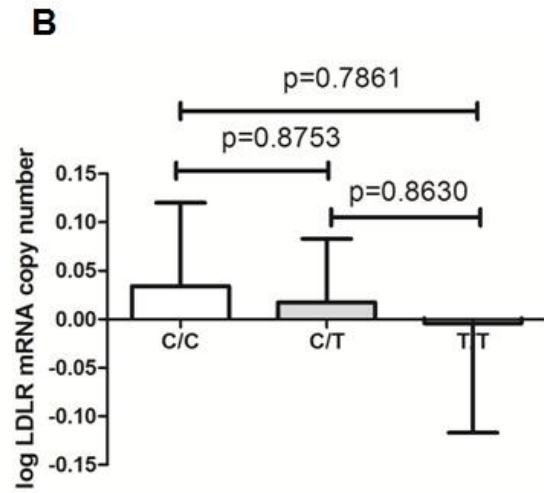

Figure S2

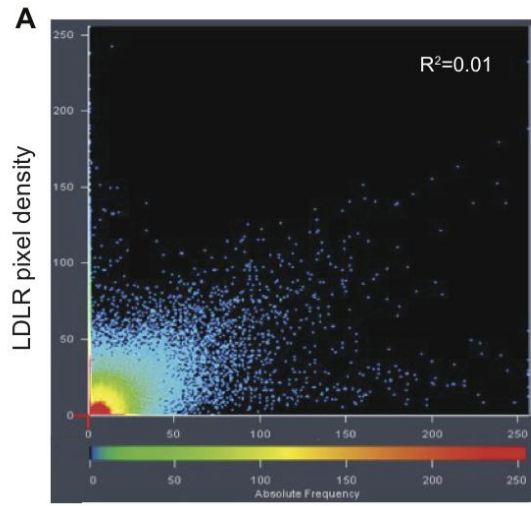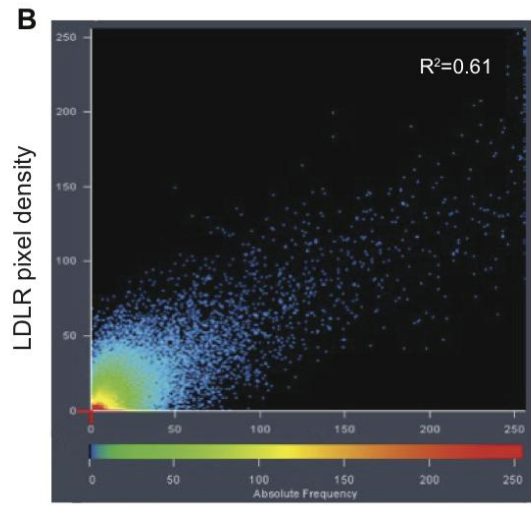

**Figure S3**

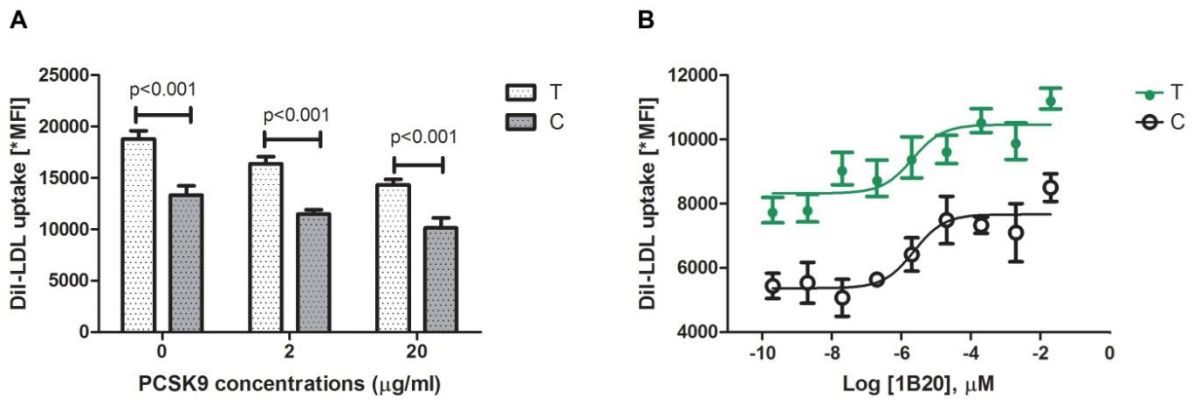

**Figure S4**
